# Supplementary material
Source: PubMed Central journal article supplement (PMC1805570)
Supplement: pnas_0611402104_3.pdf [file pnas_0611402104_3.pdf]

**Table 1. Average expression levels ( $\log_{10}$  of the number of molecules) for each species, treatment, and species-treatment combinations for 20 genes of the phototransduction cascade**

| Gene             | Species effect |                |       |                  | Environmental effect |      |       |               | Species $\times$ environment |                      |                     |                     |      |          |
|------------------|----------------|----------------|-------|------------------|----------------------|------|-------|---------------|------------------------------|----------------------|---------------------|---------------------|------|----------|
|                  | <i>D. mel.</i> | <i>D. sim.</i> | F     | <i>P</i>         | Light                | Dark | F     | <i>P</i>      | <i>D. mel.</i> light         | <i>D. sim.</i> light | <i>D. mel.</i> dark | <i>D. sim.</i> dark | F    | <i>P</i> |
| <i>ninaA</i>     | 4.31           | 4.17           | 2.61  | 0.1224           | 4.20                 | 4.28 | 2.47  | 0.1236        | 4.28                         | 4.12                 | 4.33                | 4.23                | 0.35 | 0.5585   |
| <i>Rh2</i>       | 4.40           | 3.82           | 5.80  | <b>0.0257</b>    | 4.10                 | 4.12 | 0.02  | 0.8764        | 4.35                         | 3.85                 | 4.46                | 3.79                | 0.44 | 0.5090   |
| <i>Rh3</i>       | 4.62           | 4.70           | 1.60  | 0.2200           | 4.63                 | 4.70 | 2.77  | 0.1032        | 4.58                         | 4.67                 | 4.67                | 4.73                | 0.19 | 0.6662   |
| <i>Rh4</i>       | 4.57           | 4.65           | 0.04  | 0.8388           | 4.60                 | 4.62 | 0.07  | 0.7944        | 4.55                         | 4.66                 | 4.60                | 4.63                | 0.68 | 0.4145   |
| <i>Rh5</i>       | 4.44           | 4.63           | 4.47  | <b>0.0472</b>    | 4.52                 | 4.55 | 0.33  | 0.5703        | 4.44                         | 4.61                 | 4.45                | 4.66                | 0.13 | 0.7180   |
| <i>Ggamma30A</i> | 4.43           | 4.23           | 1.39  | 0.2514           | 4.28                 | 4.38 | 10.48 | <b>0.0023</b> | 4.38                         | 4.18                 | 4.48                | 4.29                | 0.01 | 0.9061   |
| <i>GBeta76C</i>  | 4.97           | 4.95           | 0.12  | 0.7309           | 4.92                 | 5.01 | 5.17  | <b>0.0281</b> | 4.94                         | 4.89                 | 5.00                | 5.01                | 0.56 | 0.4568   |
| <i>Galpha49B</i> | 5.68           | 5.55           | 2.27  | 0.1479           | 5.61                 | 5.62 | 0.03  | 0.8689        | 5.67                         | 5.55                 | 5.69                | 5.54                | 0.10 | 0.7487   |
| <i>norpA</i>     | 5.47           | 5.42           | 0.97  | 0.3376           | 5.41                 | 5.48 | 2.61  | 0.1131        | 5.45                         | 5.38                 | 5.50                | 5.46                | 0.10 | 0.7531   |
| <i>inaC</i>      | 5.05           | 5.15           | 0.54  | 0.4706           | 5.06                 | 5.15 | 3.88  | 0.0553        | 5.02                         | 5.10                 | 5.08                | 5.21                | 0.31 | 0.5777   |
| <i>inaD</i>      | 4.90           | 4.91           | 0.02  | 0.8892           | 4.88                 | 4.93 | 1.51  | 0.2251        | 4.86                         | 4.90                 | 4.94                | 4.92                | 0.67 | 0.4164   |
| <i>ninaC</i>     | 4.65           | 4.49           | 2.36  | 0.1444           | 4.53                 | 4.62 | 2.69  | 0.1095        | 4.62                         | 4.43                 | 4.56                | 3.38                | 0.30 | 0.5871   |
| <i>trp</i>       | 5.06           | 5.15           | 2.75  | 0.1132           | 5.05                 | 5.16 | 5.11  | <b>0.0291</b> | 5.01                         | 5.09                 | 5.10                | 5.21                | 0.09 | 0.7630   |
| <i>trpl</i>      | 4.98           | 5.65           | 45.12 | <b>&lt;.0001</b> | 5.28                 | 5.36 | 4.78  | <b>0.0342</b> | 4.94                         | 5.61                 | 5.02                | 5.70                | 0.02 | 0.8849   |
| <i>rdgC</i>      | 3.91           | 3.75           | 8.39  | <b>0.0089</b>    | 3.80                 | 3.86 | 3.21  | 0.0804        | 3.89                         | 3.70                 | 3.92                | 3.81                | 1.41 | 0.2415   |
| <i>CdsA</i>      | 4.65           | 4.56           | 1.66  | 0.2134           | 4.58                 | 4.63 | 1.36  | 0.2507        | 4.64                         | 4.52                 | 4.67                | 4.59                | 0.25 | 0.6222   |
| <i>rdgB</i>      | 5.79           | 5.83           | 0.27  | 0.6105           | 5.80                 | 5.82 | 0.33  | 0.5677        | 5.75                         | 5.84                 | 5.83                | 5.81                | 1.42 | 0.2399   |
| <i>inaF</i>      | 5.09           | 4.89           | 8.12  | <b>0.0099</b>    | 4.98                 | 5.00 | 0.19  | 0.6682        | 5.08                         | 4.87                 | 5.09                | 4.90                | 0.13 | 0.7163   |
| <i>Arr1</i>      | 5.95           | 5.95           | 0.00  | 0.9956           | 5.91                 | 6.00 | 4.97  | <b>0.0309</b> | 5.92                         | 5.90                 | 5.98                | 6.01                | 0.45 | 0.5071   |
| <i>Arr2</i>      | 6.02           | 6.18           | 0.64  | 0.4339           | 6.06                 | 6.13 | 3.09  | 0.0857        | 5.99                         | 6.14                 | 6.05                | 6.22                | 0.14 | 0.7130   |

Each effect and its significance were estimated using a Mixed Model ANOVA (using the SAS program PROC MIXED). Bold-faced type indicates *P* values < 0.05. *D. mel.*, *D. melanogaster*; *D. sim.*, *D. simulans*.
