# Supplementary material
Source: PubMed Central journal article supplement (PMC1805570)
Supplement: pnas_0611402104_4.pdf [file pnas_0611402104_4.pdf]

**Table 2. Real-time quantitative PCR primers used in this study**

| Gene             | Forward                | Reverse                 |
|------------------|------------------------|-------------------------|
| <i>ninaA</i>     | ATCAACGGGACCAGCTACG    | CGGTGGTCACATAAAACTGG    |
| <i>Rh2</i>       | GAGGATTGCGACAAAAGTGC   | CCGTCGATTTTGAAGAGTCC    |
| <i>Rh3</i>       | CAGACCGGAGCATGGAGTC    | GTCG(G/C)AGAAGGCCAGATTG |
| <i>Rh4</i>       | CTGAAATTTTAACCCTGACACG | ATACGCCTTAACCGCTACCC    |
| <i>Rh5</i>       | TGTGGTCTACGTGATACCG    | ACTCATGTTATCCGCATTGG    |
| <i>Ggamma30A</i> | GCTGGTTGGTCTTGGTCTTG   | ATTAGTTGGCCCGTCTATCG    |
| <i>GBeta76C</i>  | AGCTGATCATCTGGGACACC   | CTGAGGAATCCCTCGTAGCC    |
| <i>Galpha49B</i> | AAGAGAGCCTGGATCGTAAGC  | CCTCCGATAAACAGCACTCC    |
| <i>norpA</i>     | GTGCAAAAGACCCAGAATGC   | CTCCAGCTGCTTGATCTGC     |
| <i>inaC</i>      | TGCGAAAGGATGTCATTATCC  | AGCCACAGACTCCTTGAACC    |
| <i>inaD</i>      | GCGGTACAACATGATGAAGG   | CACGAGCTTATCCCCATCC     |
| <i>ninaC</i>     | GGATCCGAGACCAACACC     | GATTCCAGGTGCAATCTCC     |
| <i>Trp</i>       | AAGCAGCTGGCACTATCAG    | TGGAAGACTCCTCCTTTTTGG   |
| <i>trpl</i>      | TTGACCCGCAACTAATAGCC   | GCGGCAAAGTACCAGAGC      |
| <i>rdgC</i>      | TAGCTGCGTAAATGTTAACCAG | GCCAGTTGCAACGCCTCTGC    |
| <i>CdsA</i>      | TATTTGAGGGGCTCATTTGG   | GGCGTGAACAAATAGCTTGG    |
| <i>rdgB</i>      | GATTGCCTTTATTCTACGGCA  | CTTCATAATGTGCACATCCAC   |
| <i>inaF</i>      | TCAGTACTGGCATAAGCATGG  | CAACCGATCTACTTGCTTTGG   |
| <i>Arr1</i>      | CCTAGTGGACCACGCAACG    | TCCACCTGAGTCACGGAATC    |
| <i>Arr2</i>      | GGAGTGATTGTGGTGGAACC   | CTGCATCGGTGTCATCTCC     |

Oligos were designed for conserved regions of the 20 major genes of the *Drosophila* phototransduction network.
